# Supplementary material for: Glycolytic overload-driven dysfunction of periodontal ligament fibroblasts in high glucose concentration, corrected by glyoxalase 1 inducer
Source: PubMed Central journal article supplement — BMJ Open Diabetes Res Care. 2020 Oct 28;8(2):e001458. doi: 10.1136/bmjdrc-2020-001458 (PMC7594206; doi:10.1136/bmjdrc-2020-001458), 2020-10-28
Supplement: bmjdrc-2020-001458supp001.pdf [file bmjdrc-2020-001458supp001.pdf]

**Glycolytic overload-driven dysfunction of periodontal ligament fibroblasts in high glucose concentration, corrected by glyoxalase 1 inducer**

Ashour et al.

**Table S1. Proteins increased in high glucose concentration cultures**

| No | Protein                                                           | UNIPROT name | HG/LG abundance ratio |
|----|-------------------------------------------------------------------|--------------|-----------------------|
| 1  | ATP-binding cassette sub-family E member 1                        | ABCE1_HUMAN  | 8.85                  |
| 2  | Axin interactor, dorsalization-associated protein                 | AIDA_HUMAN   | 7.57                  |
| 3  | E3 ubiquitin-protein ligase HUWE1                                 | HUWE1_HUMAN  | 5.61                  |
| 4  | Isoform 2 of Electron transfer flavoprotein subunit beta          | ETFB_HUMAN   | 5.57                  |
| 5  | Hexokinase-2                                                      | E9PB90_HUMAN | 3.19                  |
| 6  | Ubiquilin-1                                                       | UBQL1_HUMAN  | 3.10                  |
| 7  | Laminin subunit beta-1                                            | G3XAI2_HUMAN | 2.62                  |
| 8  | Isoform 2 of Neutral alpha-glucosidase AB                         | GANAB_HUMAN  | 2.60                  |
| 9  | Isoform 2 of Serine/arginine-rich splicing factor 11              | SRS11_HUMAN  | 2.50                  |
| 10 | Putative heat shock protein HSP 90-alpha A4                       | HS904_HUMAN  | 2.46                  |
| 11 | Something about silencing protein 10                              | SAS10_HUMAN  | 2.38                  |
| 12 | Catenin beta-1                                                    | CTNB1_HUMAN  | 2.37                  |
| 13 | F-box-like/WD repeat-containing protein TBL1XR1                   | TBL1R_HUMAN  | 2.33                  |
| 14 | Isoform 3 of Inositol monophosphatase 1                           | IMPA1_HUMAN  | 2.16                  |
| 15 | Diablo homolog, mitochondrial                                     | DBLOH_HUMAN  | 2.14                  |
| 16 | Isoform 2 of Eukaryotic initiation factor 4A-II                   | IF4A2_HUMAN  | 2.11                  |
| 17 | ADP-ribosylation factor 4                                         | ARF4_HUMAN   | 2.10                  |
| 18 | Isoform XB of Plasma membrane calcium-transporting ATPase 4       | AT2B4_HUMAN  | 2.10                  |
| 19 | DNA damage-binding protein 1                                      | DDB1_HUMAN   | 2.09                  |
| 20 | Eukaryotic translation initiation factor 3 subunit I              | EIF3I_HUMAN  | 2.08                  |
| 21 | Isoform 2 of E3 ubiquitin-protein ligase CHIP                     | CHIP_HUMAN   | 2.04                  |
| 22 | Ribonuclease inhibitor                                            | RINI_HUMAN   | 2.03                  |
| 23 | Isoform 2 of Probable ubiquitin carboxyl-terminal hydrolase FAF-X | USP9X_HUMAN  | 2.02                  |
| 24 | Endophilin-A2                                                     | SH3G1_HUMAN  | 2.00                  |
| 25 | Isoform 3 of E3 ubiquitin-protein ligase RNF31                    | RNF31_HUMAN  | 1.97                  |
| 26 | COP9 signalosome complex subunit 5                                | CSN5_HUMAN   | 1.96                  |

|    |                                                       |                |      |
|----|-------------------------------------------------------|----------------|------|
| 27 | Macrophage-capping protein                            | CAPG_HUMAN     | 1.95 |
| 28 | Isoform 2 of Adenosine kinase                         | ADK_HUMAN      | 1.95 |
| 29 | Isoform C1 of Tight junction protein ZO-2             | ZO2_HUMAN      | 1.94 |
| 30 | Serine/threonine-protein kinase Nek9                  | NEK9_HUMAN     | 1.94 |
| 31 | T-complex protein 1 subunit eta                       | TCPH_HUMAN     | 1.91 |
| 32 | Putative adenosylhomocysteinase 2                     | SAHH2_HUMAN    | 1.91 |
| 33 | Isoform 2 of Mitogen-activated protein kinase 3       | MK03_HUMAN     | 1.91 |
| 34 | Isoform 3 of Disabled homolog 2                       | DAB2_HUMAN     | 1.90 |
| 35 | Isoform 4 of Golgin subfamily A member 4              | GOGA4_HUMAN    | 1.89 |
| 36 | Isoform 5 of Ubiquitin-associated protein 2-like      | UBP2L_HUMAN    | 1.87 |
| 37 | Pyruvate kinase-M                                     | H3BR70_HUMAN   | 1.84 |
| 38 | TELO2-interacting protein 2                           | E5RIH5_HUMAN   | 1.84 |
| 39 | GMP synthase [glutamine-hydrolyzing]                  | GUAA_HUMAN     | 1.83 |
| 40 | 40S ribosomal protein S17-like                        | RS17_HUMAN     | 1.82 |
| 41 | X-ray repair cross-complementing protein 6            | XRCC6_HUMAN    | 1.82 |
| 42 | Eukaryotic translation initiation factor 4 gamma 3    | A0A0A0MSA7_HUM | 1.82 |
| 43 | Serine/threonine-protein phosphatase 2A activator     | A6PVN5_HUMAN   | 1.82 |
| 44 | Puromycin-sensitive aminopeptidase                    | E9PLK3_HUMAN   | 1.82 |
| 45 | Beta-hexosaminidase                                   | H3BP20_HUMAN   | 1.80 |
| 46 | Isoform 2 of Lysosomal alpha-mannosidase              | MA2B1_HUMAN    | 1.79 |
| 47 | Vacuolar protein sorting-associated protein 29        | F8VXU5_HUMAN   | 1.79 |
| 48 | Prefoldin subunit 3                                   | B4DWR3_HUMAN   | 1.78 |
| 49 | Chromobox protein homolog 3                           | CBX3_HUMAN     | 1.76 |
| 50 | Acyl-protein thioesterase 2                           | LYPA2_HUMAN    | 1.76 |
| 51 | DCC-interacting protein 13-alpha                      | DP13A_HUMAN    | 1.76 |
| 52 | Isoform 2 of Protein flightless-1 homolog             | FLII_HUMAN     | 1.73 |
| 53 | UPF0364 protein C6orf211                              | ARMT1_HUMAN    | 1.73 |
| 54 | Twinfilin-1                                           | TWF1_HUMAN     | 1.73 |
| 55 | Heterogeneous nuclear ribonucleoprotein L-like        | B7WPG3_HUMAN   | 1.71 |
| 56 | Isoform 5 of Rho guanine nucleotide exchange factor 7 | ARHG7_HUMAN    | 1.70 |
| 57 | Coronin-1B                                            | COR1B_HUMAN    | 1.70 |

|    |                                                                                                   |              |      |
|----|---------------------------------------------------------------------------------------------------|--------------|------|
| 58 | 26S proteasome non-ATPase regulatory subunit 14                                                   | PSDE_HUMAN   | 1.69 |
| 59 | Splicing factor 3A subunit 3                                                                      | SF3A3_HUMAN  | 1.69 |
| 60 | Isoform 4 of Glucosamine-6-phosphate isomerase 2                                                  | GNPI2_HUMAN  | 1.69 |
| 61 | Glyoxalase domain-containing protein 4                                                            | F6TLX2_HUMAN | 1.69 |
| 62 | Phosphoglucomutase-2                                                                              | PGM2_HUMAN   | 1.67 |
| 63 | Filamin-C                                                                                         | FLNC_HUMAN   | 1.67 |
| 64 | Isoform 2F of Cytoplasmic dynein 1 intermediate chain 2                                           | DC1I2_HUMAN  | 1.64 |
| 65 | Isoform 2 of Arf-GAP domain and FG repeat-containing protein 1                                    | AGFG1_HUMAN  | 1.64 |
| 66 | Heat shock 70 kDa protein 1A                                                                      | HS71A_HUMAN  | 1.63 |
| 67 | Isoform 2 of Programmed cell death 6-interacting protein                                          | PDC6I_HUMAN  | 1.62 |
| 68 | Isoform 2 of Serine/threonine-protein phosphatase 2B catalytic subunit 2                          | PP2BA_HUMAN  | 1.62 |
| 69 | Aldo-keto reductase family 1 member C3                                                            | AK1C3_HUMAN  | 1.62 |
| 70 | Target of Myb protein 1                                                                           | TOM1_HUMAN   | 1.60 |
| 71 | Rab GTPase-activating protein 1                                                                   | RBGP1_HUMAN  | 1.60 |
| 72 | Isocitrate dehydrogenase [NADP] cytoplasmic                                                       | IDHC_HUMAN   | 1.60 |
| 73 | Isoform 2 of Ataxin-2-like protein                                                                | ATX2L_HUMAN  | 1.60 |
| 74 | Prolow-density lipoprotein receptor-related protein 1                                             | LRP1_HUMAN   | 1.59 |
| 75 | Isoform 2 of NEDD8-activating enzyme E1 regulatory subunit 1                                      | ULA1_HUMAN   | 1.59 |
| 76 | Kinesin-1 heavy chain                                                                             | KINH_HUMAN   | 1.59 |
| 77 | Nucleoprotein TPR                                                                                 | TPR_HUMAN    | 1.58 |
| 78 | T-complex protein 1 subunit zeta                                                                  | TCPZ_HUMAN   | 1.57 |
| 79 | Prefoldin subunit 5                                                                               | PFD5_HUMAN   | 1.56 |
| 80 | L-lactate dehydrogenase B chain                                                                   | LDHB_HUMAN   | 1.56 |
| 81 | F-actin-capping protein subunit alpha-2                                                           | CAZA2_HUMAN  | 1.55 |
| 82 | T-complex protein 1 subunit delta                                                                 | TCPD_HUMAN   | 1.55 |
| 83 | T-complex protein 1 subunit epsilon                                                               | E9PCA1_HUMAN | 1.55 |
| 84 | Calpain-2 catalytic subunit                                                                       | CAN2_HUMAN   | 1.54 |
| 85 | 26S proteasome non-ATPase regulatory subunit 3                                                    | PSMD3_HUMAN  | 1.54 |
| 86 | Dihydrolipoyllysine-residue succinyltransferase component of 2-oxoglutarate dehydrogenase complex | ODO2_HUMAN   | 1.54 |
| 87 | Tropomodulin-3                                                                                    | TMOD3_HUMAN  | 1.53 |
| 88 | Valine--tRNA ligase                                                                               | SYVC_HUMAN   | 1.53 |

|     |                                                                          |              |      |
|-----|--------------------------------------------------------------------------|--------------|------|
| 89  | Protein HEXIM1                                                           | HEXI1_HUMAN  | 1.53 |
| 90  | Isoform 2 of Dynactin subunit 2                                          | DCTN2_HUMAN  | 1.52 |
| 91  | Isoform 2 of Elongation factor 1-gamma                                   | EF1G_HUMAN   | 1.52 |
| 92  | T-complex protein 1 subunit alpha                                        | TCPA_HUMAN   | 1.52 |
| 93  | 4-trimethylaminobutyraldehyde dehydrogenase                              | AL9A1_HUMAN  | 1.51 |
| 94  | T-complex protein 1 subunit beta                                         | TCPB_HUMAN   | 1.51 |
| 95  | Isoform 2 of Golgi-specific brefeldin A-resistance guanine nucleotide ex | GBF1_HUMAN   | 1.51 |
| 96  | Cytoplasmic dynein 1 light intermediate chain 2                          | DC1L2_HUMAN  | 1.51 |
| 97  | Glutathione S-transferase omega-1                                        | GSTO1_HUMAN  | 1.50 |
| 98  | Kinectin                                                                 | KTN1_HUMAN   | 1.50 |
| 99  | Dynactin subunit 1                                                       | E7EX90_HUMAN | 1.50 |
| 100 | Trifunctional purine biosynthetic protein adenosine-3                    | PUR2_HUMAN   | 1.49 |
| 101 | Protein disulfide-isomerase A4                                           | PDIA4_HUMAN  | 1.49 |
| 102 | Lupus La protein                                                         | LA_HUMAN     | 1.49 |
| 103 | Kinesin light chain 1                                                    | G3V5R9_HUMAN | 1.49 |
| 104 | COP9 signalosome complex subunit 6                                       | CSN6_HUMAN   | 1.48 |
| 105 | Uroporphyrinogen decarboxylase                                           | DCUP_HUMAN   | 1.48 |
| 106 | DnaJ homolog subfamily A member 2                                        | DNJA2_HUMAN  | 1.48 |
| 107 | Aspartate aminotransferase, cytoplasmic                                  | AATC_HUMAN   | 1.48 |
| 108 | Isoform 4 of Cold shock domain-containing protein E1                     | CSDE1_HUMAN  | 1.48 |
| 109 | Transitional endoplasmic reticulum ATPase                                | TERA_HUMAN   | 1.48 |
| 110 | Prostaglandin reductase 1                                                | PTGR1_HUMAN  | 1.48 |
| 111 | Isoleucine--tRNA ligase, cytoplasmic                                     | J3KR24_HUMAN | 1.47 |
| 112 | Sialic acid synthase                                                     | SIAS_HUMAN   | 1.46 |
| 113 | Asparagine--tRNA ligase, cytoplasmic                                     | SYNC_HUMAN   | 1.46 |
| 114 | Peptidyl-prolyl cis-trans isomerase FKBP10                               | FKB10_HUMAN  | 1.46 |
| 115 | Isoform IIa of Prolyl 4-hydroxylase subunit alpha-2                      | P4HA2_HUMAN  | 1.46 |
| 116 | Isoform 2 of Protein SEC13 homolog                                       | SEC13_HUMAN  | 1.45 |
| 117 | 26S protease regulatory subunit 6A                                       | E9PM69_HUMAN | 1.45 |
| 118 | 26S proteasome non-ATPase regulatory subunit 1                           | PSMD1_HUMAN  | 1.44 |
| 119 | Heat shock protein 105 kDa                                               | HS105_HUMAN  | 1.43 |

|     |                                                                             |              |      |
|-----|-----------------------------------------------------------------------------|--------------|------|
| 120 | Gamma-adducin                                                               | ADDG_HUMAN   | 1.43 |
| 121 | ATP-dependent 6-phosphofructokinase, platelet type                          | PFKAP_HUMAN  | 1.42 |
| 122 | Peroxiredoxin-2                                                             | PRDX2_HUMAN  | 1.42 |
| 123 | Heat shock cognate 71 kDa protein                                           | A8K7Q2_HUMAN | 1.42 |
| 124 | Eukaryotic translation initiation factor 3 subunit H                        | B3KS98_HUMAN | 1.42 |
| 125 | Actin-like protein 6A                                                       | ACL6A_HUMAN  | 1.41 |
| 126 | Serine/threonine-protein phosphatase 2A 65 kDa regulatory subunit A alpha 2 | 2AAA_HUMAN   | 1.41 |
| 127 | Methionine--tRNA ligase, cytoplasmic                                        | SYMC_HUMAN   | 1.41 |
| 128 | F-actin-capping protein subunit alpha-1                                     | CAZA1_HUMAN  | 1.41 |
| 129 | Eukaryotic translation initiation factor 3 subunit L                        | B0QY89_HUMAN | 1.39 |
| 130 | Isoform 2 of Nuclear pore complex protein Nup214                            | NU214_HUMAN  | 1.38 |
| 131 | Isoform 2 of Poly(U)-binding-splicing factor PUF60                          | PUF60_HUMAN  | 1.38 |
| 132 | Rab3 GTPase-activating protein non-catalytic subunit                        | RBGPR_HUMAN  | 1.38 |
| 133 | Protein GJA9-MYCBP                                                          | MYCBP_HUMAN  | 1.37 |
| 134 | Prolyl 4-hydroxylase subunit alpha-1                                        | P4HA1_HUMAN  | 1.34 |
| 135 | Isoform 2 of Tyrosine-protein phosphatase non-receptor type 11              | PTN11_HUMAN  | 1.34 |
| 136 | Serine/threonine-protein kinase OSR1                                        | OXSR1_HUMAN  | 1.34 |
| 137 | Isoform Sap-mu-9 of Prosaposin                                              | SAP_HUMAN    | 1.34 |
| 138 | Vimentin                                                                    | VIME_HUMAN   | 1.33 |
| 139 | Isoform 2 of Far upstream element-binding protein 1                         | FUBP1_HUMAN  | 1.32 |
| 140 | Poly(rC)-binding protein 1                                                  | PCBP1_HUMAN  | 1.30 |
| 141 | Phosphomannomutase 2                                                        | PMM2_HUMAN   | 1.28 |
| 142 | Peptidyl-prolyl cis-trans isomerase A                                       | PPIA_HUMAN   | 1.27 |
| 143 | Mitochondrial 10-formyltetrahydrofolate dehydrogenase                       | AL1L2_HUMAN  | 1.27 |
| 144 | Profilin-1                                                                  | PROF1_HUMAN  | 1.25 |

**Glycolytic overload-driven dysfunction of periodontal ligament fibroblasts in high glucose concentration, corrected by glyoxalase 1 inducer**

Ashour et al.

**Table S2. Proteins at risk of MG modification - modification sites and location in functional domains.**

| No | Protein                                             | Uniprot ID  | No of MG modification sites | No of arg | MG modification sites                                                                                           | MG-modified arg in RBD | MG modification sites in RBD                                     |
|----|-----------------------------------------------------|-------------|-----------------------------|-----------|-----------------------------------------------------------------------------------------------------------------|------------------------|------------------------------------------------------------------|
| 1  | Vimentin                                            | VIME_HUMAN  | 20                          | 43        | R78, R100, R113, R145, R155, R170, R175, R186, R207, R270, R273, R304, R310, R321, R345, R378, R401, R424, R450 | 11                     | R145, R175, R186, R207, R273, R304, R321, R345, R401, R424, R450 |
| 2  | Endoplasmic reticulum chaperone BiP                 | BIP_HUMAN   | 13                          | 28        | R74, R101, R197, R214, R306, R324, R367, R470, R532, R540, R562                                                 | 2                      | R214, R532                                                       |
| 3  | Endoplasmic                                         | ENPL_HUMAN  | 12                          | 37        | R43, R51, R67, R84, R116, R156, R395, R415, R448, R505, R557, R690                                              | 4                      | R43, R51, R156, R690                                             |
| 4  | Prelamin-A/C                                        | LMNA_HUMAN  | 10                          | 64        | R62, R72, R101, R156, R275, R351, R377, R439, R527, R541                                                        | 2                      | R156, R275                                                       |
| 5  | Plectin                                             | PLEC_HUMAN  | 9                           | 453       | R248, R258, R349, R517, R587, R1782, R1824, R2141, R2265                                                        | 3                      | R258, R517, R2141                                                |
| 6  | Cytoskeleton-associated protein 4                   | CKAP4_HUMAN | 8                           | 36        | R177, R228, R326, R394, R429, R454, R491, R523                                                                  | 3                      | R228, R429, R454                                                 |
| 7  | Stress-70 protein, mitochondrial                    | GRP75_HUMAN | 8                           | 36        | R146, R218, R284, R391, R405, R541, R578, R634                                                                  | 2                      | R541, R578                                                       |
| 8  | Actin, cytoplasmic 2                                | ACTG_HUMAN  | 6                           | 18        | R196, R206, R312, R372                                                                                          | 3                      | R196, R312, R372                                                 |
| 9  | Alpha-actinin-4                                     | ACTN4_HUMAN | 6                           | 51        | R79, R95, R204, R251, R439, R695                                                                                | 4                      | R79, R204, R251, R439                                            |
| 10 | Neuroblast differentiation-associated protein AHNAK | AHNAK_HUMAN | 6                           | 44        | R186, R1104, R1811, R2490, R3924, R5366                                                                         |                        |                                                                  |
| 11 | Protein disulfide-isomerase                         | PDIA1_HUMAN | 6                           | 16        | R97, R120, R132, R213, R300                                                                                     | 2                      | R132, R213                                                       |
| 12 | Annexin A6                                          | ANXA6_HUMAN | 5                           | 42        | R140, R206, R358, R427, R471                                                                                    | 2                      | R140, R206                                                       |
| 13 | Moesin                                              | MOES_HUMAN  | 5                           | 41        | R40, R100, R233, R495, R533                                                                                     | 2                      | R233, R533                                                       |
| 14 | Protein disulfide-isomerase A4                      | PDIA4_HUMAN | 5                           | 22        | R131, R155, R165, R370, R622                                                                                    | 4                      | R155, R165, R370, R622                                           |
| 15 | Filamin-A                                           | FLNA_HUMAN  | 4                           | 93        | R285, R921, R1312, R1381                                                                                        | 2                      | R285, R1312                                                      |
| 16 | Heat shock cognate 71 kDa protein                   | HSP7C_HUMAN | 4                           | 28        | R155, R171, R342, R517                                                                                          | 1                      | R155                                                             |
| 17 | Protein disulfide-isomerase A6                      | PDIA6_HUMAN | 4                           | 20        | R132, R256, R386                                                                                                |                        |                                                                  |
| 18 | 10 kDa heat shock protein, mitochondrial            | CH10_HUMAN  | 3                           | 4         | R15, R20, R92                                                                                                   |                        |                                                                  |
| 19 | 14-3-3 protein zeta/delta                           | 1433Z_HUMAN | 3                           | 11        | R60, R91, R127                                                                                                  |                        |                                                                  |
| 20 | Annexin A1                                          | ANXA1_HUMAN | 3                           | 19        | R124, R144, R177                                                                                                | 1                      | R144                                                             |
| 21 | Annexin A5                                          | ANXA5_HUMAN | 3                           | 19        | R18, R123, R245                                                                                                 | 1                      | R18                                                              |

|    |                                                         |             |   |    |                    |   |                 |
|----|---------------------------------------------------------|-------------|---|----|--------------------|---|-----------------|
| 22 | Calreticulin                                            | CALR_HUMAN  | 3 | 8  | R73, R177, R222    | 1 | R222            |
| 23 | Citrate synthase                                        | CISY_HUMAN  | 3 | 21 | R60, R81, R316     |   |                 |
| 24 | Collagen alpha-1(I) chain                               | CO1A1_HUMAN | 3 | 71 | R598, R1036, R1252 | 1 | R1252           |
| 25 | Fructose-bisphosphate aldolase A                        | ALDOA_HUMAN | 3 | 15 | R22, R43, R259     | 1 | R43             |
| 26 | Galectin-1                                              | LEG1_HUMAN  | 3 | 5  | R49, R74, R112     | 3 | R49, R74, R112  |
| 27 | Glucosidase 2 subunit beta                              | GLU2B_HUMAN | 3 | 20 | R124, R381, R484   | 1 | R484            |
| 28 | Glutamate dehydrogenase 1, mitochondrial                | DHE3_HUMAN  | 3 | 35 | R151, R274, R516   |   |                 |
| 29 | Heterogeneous nuclear ribonucleoprotein Q               | HNRPQ_HUMAN | 3 | 45 | R60, R171, R343    |   |                 |
| 30 | Isoform 2 of Heterogeneous nuclear ribonucleoprotein A1 | ROA1_HUMAN  | 3 | 24 | R75, R140, R146    | 3 | R75, R140, R146 |
| 31 | Isoform 4 of Perilipin-3                                | PLIN3_HUMAN | 3 | 19 | R98, R143, R168    |   |                 |
| 32 | Phosphoglycerate kinase 1                               | PGK1_HUMAN  | 3 | 11 | R66, R171, R206    |   |                 |
| 33 | Protein disulfide-isomerase A3                          | PDIA3_HUMAN | 3 | 22 | R119, R140, R448   |   |                 |
| 34 | Ribosome-binding protein 1                              | RRBP1_HUMAN | 3 | 46 | R669, R1227, R1333 |   |                 |
| 35 | Tropomyosin alpha-4 chain                               | TPM4_HUMAN  | 3 | 18 | R27, R142, R208    | 1 | R27             |
| 36 | Vinculin                                                | VINC_HUMAN  | 3 | 67 | R56, R113, R669    |   |                 |
| 37 | Voltage-dependent anion-selective channel protein 1     | VDAC1_HUMAN | 3 | 7  | R63, R93, R163     | 2 | R63, R163       |
| 38 | 6-phosphogluconate dehydrogenase, decarboxylating       | 6PGD_HUMAN  | 2 | 20 | R111, R382         | 2 | R111, R382      |
| 39 | 60 kDa heat shock protein, mitochondrial                | CH60_HUMAN  | 2 | 22 | R121, R370         | 1 | R370            |
| 40 | Aconitate hydratase, mitochondrial                      | ACON_HUMAN  | 2 | 34 | R548, R632         |   |                 |
| 41 | Annexin A4                                              | ANXA4_HUMAN | 2 | 24 | R24, R96           | 1 | R96             |
| 42 | Calmodulin                                              | CALM3_HUMAN | 2 | 6  | R75, R91           |   |                 |
| 43 | Elongation factor 2                                     | EF2_HUMAN   | 2 | 44 | R647               | 1 | R647            |
| 44 | Endoplasmic reticulum resident protein 44               | ERP44_HUMAN | 2 | 24 | R148, R285         |   |                 |
| 45 | Glucose-6-phosphate isomerase (Fragment)                | G6PI_HUMAN  | 2 | 27 | R81, R111          |   |                 |
| 46 | Heat shock protein HSP 90-beta                          | HS90B_HUMAN | 2 | 32 | R504, R639         | 2 | R504, R639      |
| 47 | Heterogeneous nuclear ribonucleoproteins A2/B1          | ROA2_HUMAN  | 2 | 24 | R38, R147          | 1 | R147            |

|    |                                                                             |             |   |     |             |   |             |
|----|-----------------------------------------------------------------------------|-------------|---|-----|-------------|---|-------------|
| 48 | Isoform 4 of Inhibitor of nuclear factor kappa-B kinase-interacting protein | IKIP_HUMAN  | 2 | 17  | R218, R285  |   |             |
| 49 | L-lactate dehydrogenase B chain                                             | LDHB_HUMAN  | 2 | 8   | R100, R113  | 1 | R100        |
| 50 | Malate dehydrogenase, mitochondrial                                         | MDHM_HUMAN  | 2 | 10  | R52, R191   |   |             |
| 51 | Membrane-associated progesterone receptor component 2                       | PGRC2_HUMAN | 2 | 14  | R101        | 1 | R101        |
| 52 | Microtubule-associated protein 1B                                           | MAP1B_HUMAN | 2 | 64  | R990, R1495 | 2 | R990, R1495 |
| 53 | NADH-cytochrome b5 reductase 3                                              | NB5R3_HUMAN | 2 | 18  | R143, R192  |   |             |
| 54 | Nucleolin                                                                   | NUCL_HUMAN  | 2 | 26  | R420, R457  |   |             |
| 55 | Peptidyl-prolyl cis-trans isomerase B                                       | PPIB_HUMAN  | 2 | 9   | R109, R180  |   |             |
| 56 | Prolyl 4-hydroxylase subunit alpha-1                                        | P4HA1_HUMAN | 2 | 26  | R90, R136   | 1 | R90         |
| 57 | Protein S100-A11                                                            | S10AB_HUMAN | 2 | 2   | R12, R62    |   |             |
| 58 | Protein S100-A6                                                             | S10A6_HUMAN | 2 | 3   | R55         |   |             |
| 59 | Reticulocalbin-1                                                            | RCN1_HUMAN  | 2 | 23  | R90, R188   | 1 | R188        |
| 60 | SH3 domain-binding glutamic acid-rich-like protein 3                        | SH3L3_HUMAN | 2 | 6   | R159, R180  |   |             |
| 61 | Stress-induced-phosphoprotein 1                                             | STIP1_HUMAN | 2 | 26  | R305, R351  |   |             |
| 62 | Talin-1                                                                     | TLN1_HUMAN  | 2 | 105 | R606, R1122 |   |             |
| 63 | Transgelin                                                                  | TAGL_HUMAN  | 2 | 11  | R128, R146  | 1 | R146        |
| 64 | Transmembrane emp24 domain-containing protein 10                            | TMEDA_HUMAN | 2 | 14  | R71, R116   |   |             |
| 65 | 14-3-3 protein epsilon                                                      | 1433E_HUMAN | 1 | 14  | R225        |   |             |
| 66 | 26S proteasome non-ATPase regulatory subunit 7                              | PSMD7_HUMAN | 1 | 11  | R25         |   |             |
| 67 | 40S ribosomal protein S17                                                   | RS17_HUMAN  | 1 | 13  | R81         | 1 | R81         |
| 68 | 40S ribosomal protein S28                                                   | RS28_HUMAN  | 1 | 10  | R31         |   |             |
| 69 | 60S acidic ribosomal protein P2                                             | RLA2_HUMAN  | 1 | 1   | R38         | 1 | R38         |
| 70 | Acyl-CoA-binding protein                                                    | ACBP_HUMAN  | 1 | 2   | R100        |   |             |



|    |                                                                      |             |   |     |       |   |       |
|----|----------------------------------------------------------------------|-------------|---|-----|-------|---|-------|
| 71 | Adenylate kinase 2, mitochondrial                                    | KAD2_HUMAN  | 1 | 15  | R138  |   |       |
| 72 | Adenylyl cyclase-associated protein 1                                | CAP1_HUMAN  | 1 | 12  | R167  |   |       |
| 73 | Alpha-actinin-1                                                      | ACTN1_HUMAN | 1 | 54  | R60   | 1 | R60   |
| 74 | Alpha-enolase                                                        | ENOA_HUMAN  | 1 | 17  | R32   |   |       |
| 75 | Annexin A11                                                          | ANX11_HUMAN | 1 | 27  | R494  | 1 | R494  |
| 76 | Annexin A2                                                           | ANXA2_HUMAN | 1 | 21  | R273  |   |       |
| 77 | Proliferation marker protein Ki-67                                   | KI67_HUMAN  | 1 | 196 | R1939 | 1 | R1939 |
| 78 | Apoptotic chromatin condensation inducer in the nucleus              | ACINU_HUMAN | 1 | 148 | R1176 |   |       |
| 79 | ATP synthase subunit alpha, mitochondrial                            | ATPA_HUMAN  | 1 | 38  | R149  |   |       |
| 80 | ATP synthase subunit beta, mitochondrial                             | ATPB_HUMAN  | 1 | 26  | R456  | 1 | R456  |
| 81 | Caldesmon (Fragment)                                                 | CALD1_HUMAN | 1 | 86  | R159  | 1 | R159  |
| 82 | Calponin-2                                                           | CNN2_HUMAN  | 1 | 9   | R35   |   |       |
| 83 | Capping protein (Actin filament) muscle Z-line, beta, isoform CRA_a  | CAPZB_HUMAN | 1 | 15  | R213  |   |       |
| 84 | Catenin alpha-1                                                      | CTNA1_HUMAN | 1 | 49  | R165  | 1 | R165  |
| 85 | Polymerase I and transcript release factor                           | CAVN1_HUMAN | 1 | 29  | R355  | 1 | R355  |
| 86 | CD99 antigen                                                         | CD99_HUMAN  | 1 | 5   | R170  | 1 | R170  |
| 87 | Chloride intracellular channel protein 1                             | CLIC1_HUMAN | 1 | 9   | R165  | 1 | R165  |
| 88 | Coactosin-like protein                                               | COTL1_HUMAN | 1 | 7   | R91   | 1 | R91   |
| 89 | Cofilin-1                                                            | COF1_HUMAN  | 1 | 4   | R119  |   |       |
| 90 | Collagen alpha-2(I) chain                                            | CO1A2_HUMAN | 1 | 72  | R1154 |   |       |
| 91 | Collagen alpha-2(VI) chain                                           | CO6A2_HUMAN | 1 | 68  | R993  |   |       |
| 92 | Collagen alpha-3(VI) chain                                           | CO6A3_HUMAN | 1 | 188 | R925  |   |       |
| 93 | Complement component 1 Q subcomponent-binding protein, mitochondrial | C1QBP_HUMAN | 1 | 15  | R94   | 1 | R94   |
| 94 | D-tyrosyl-tRNA(Tyr) deacylase (Fragment)                             | DTD1_HUMAN  | 1 | 13  | R78   |   |       |

|     |                                                                                                                  |             |   |     |       |   |       |
|-----|------------------------------------------------------------------------------------------------------------------|-------------|---|-----|-------|---|-------|
| 95  | Dihydrolipoyllysine-residue succinyltransferase component of 2-oxoglutarate dehydrogenase complex, mitochondrial | ODO2_HUMAN  | 1 | 30  | R144  | 1 | R144  |
| 96  | DNA damage-binding protein 1                                                                                     | DDB1_HUMAN  | 1 | 48  | R1102 | 1 | R1102 |
| 97  | Dolichyl-diphosphooligosaccharide--protein glycosyltransferase                                                   | RPN1_HUMAN  | 1 | 29  | R536  | 1 | R536  |
| 98  | Dynactin subunit 2                                                                                               | DCTN2_HUMAN | 1 | 14  | R282  |   |       |
| 99  | Elongation factor 1-alpha 1                                                                                      | EF1A1_HUMAN | 1 | 17  | R96   |   |       |
| 100 | Endoplasmic reticulum resident protein 29                                                                        | ERP29_HUMAN | 1 | 8   | R75   |   |       |
| 101 | Enoyl-CoA hydratase, mitochondrial                                                                               | ECHM_HUMAN  | 1 | 12  | R54   | 1 | R54   |
| 102 | Epoxide hydrolase 1                                                                                              | HYEP_HUMAN  | 1 | 21  | R267  |   |       |
| 103 | Eukaryotic translation initiation factor 4B                                                                      | IF4B_HUMAN  | 1 | 78  | R165  | 1 | R165  |
| 104 | Eukaryotic translation initiation factor 5A-1                                                                    | IF5A1_HUMAN | 1 | 5   | R86   | 1 | R86   |
| 105 | Filamin-C                                                                                                        | FLNC_HUMAN  | 1 | 117 | R916  |   |       |
| 106 | Glutathione S-transferase omega-1                                                                                | GSTO1_HUMAN | 1 | 9   | R48   |   |       |
| 107 | Glyceraldehyde-3-phosphate dehydrogenase                                                                         | G3P_HUMAN   | 1 | 10  | R80   | 1 | R80   |
| 108 | Heat shock protein beta-1                                                                                        | HSPB1_HUMAN | 1 | 16  | R188  | 1 | R188  |
| 109 | Heat shock protein HSP 90-alpha                                                                                  | HS90A_HUMAN | 1 | 30  | R46   |   |       |
| 110 | Heterogeneous nuclear ribonucleoprotein F                                                                        | HNRPF_HUMAN | 1 | 24  | R52   | 1 | R52   |
| 111 | Hypoxia up-regulated protein 1                                                                                   | HYOU1_HUMAN | 1 | 57  | R729  |   |       |
| 112 | Integrin beta-1                                                                                                  | ITB1_HUMAN  | 1 | 29  | R174  |   |       |
| 113 | Interleukin enhancer-binding factor 2                                                                            | ILF2_HUMAN  | 1 | 22  | R65   |   |       |
| 114 | Interleukin enhancer-binding factor 3                                                                            | ILF3_HUMAN  | 1 | 37  | R177  |   |       |
| 115 | Isoform 2 of Band 4.1-like protein 3                                                                             | E41L3_HUMAN | 1 | 54  | R525  |   |       |
| 116 | Isoform 2 of Gelsolin                                                                                            | GELS_HUMAN  | 1 | 42  | R575  |   |       |

|     |                                                                       |             |   |    |       |   |      |
|-----|-----------------------------------------------------------------------|-------------|---|----|-------|---|------|
| 117 | Isoform 2 of Tropomyosin alpha-3 chain                                | TPM3_HUMAN  | 1 | 14 | R142  |   |      |
| 118 | Isoform 2 of Vesicle-associated membrane protein-associated protein A | VAPA_HUMAN  | 1 | 13 | R127  |   |      |
| 119 | Isoform 3 of Nucleoside diphosphate kinase B                          | NDKB_HUMAN  | 1 | 9  | R173  |   |      |
| 120 | Isoform 7 of CD44 antigen                                             | CD44_HUMAN  | 1 | 34 | R665  |   |      |
| 121 | Isoform Cytoplasmic of Fumarate hydratase, mitochondrial              | FUMH_HUMAN  | 1 | 19 | R243  |   |      |
| 122 | L-lactate dehydrogenase A                                             | LDHA_HUMAN  | 1 | 11 | R99   | 1 | R99  |
| 123 | Lamina-associated polypeptide 2, isoforms beta/gamma                  | LAP2A_HUMAN | 1 | 34 | R33   |   |      |
| 124 | Laminin subunit gamma-1                                               | LAMC1_HUMAN | 1 | 95 | R149  |   |      |
| 125 | Leucine-rich PPR motif-containing protein, mitochondrial              | LPPRC_HUMAN | 1 | 67 | R1223 |   |      |
| 126 | LIM domain and actin-binding protein 1                                | LIMA1_HUMAN | 1 | 42 | R335  |   |      |
| 127 | Lupus La protein                                                      | LA_HUMAN    | 1 | 17 | R266  |   |      |
| 128 | MARCKS-related protein                                                | MRP_HUMAN   | 1 | 3  | R10   |   |      |
| 129 | Membrane-associated progesterone receptor component 1                 | PGRC1_HUMAN | 1 | 11 | R47   |   |      |
| 130 | Multifunctional protein ADE2 (Fragment)                               | PUR6_HUMAN  | 1 | 16 | R298  |   |      |
| 131 | Multiple coagulation factor deficiency protein 2                      | MCFD2_HUMAN | 1 | 4  | R126  |   |      |
| 132 | Myristoylated alanine-rich C-kinase substrate                         | MARCS_HUMAN | 1 | 2  | R18   |   |      |
| 133 | Nardilysin                                                            | NRDC_HUMAN  | 1 | 47 | R762  |   |      |
| 134 | Nascent polypeptide-associated complex subunit                        | NACAM_HUMAN | 1 | 17 | R1949 |   |      |
| 135 | Nucleobindin 2, isoform CRA_b                                         | NUCB2_HUMAN | 1 | 16 | R311  | 1 | R311 |
| 136 | Nucleophosmin                                                         | NPM_HUMAN   | 1 | 8  | R291  | 1 | R291 |
| 137 | Peptidyl-prolyl cis-trans isomerase A                                 | PPIA_HUMAN  | 1 | 6  | R148  | 1 | R148 |

|     |                                                         |             |   |    |       |   |      |
|-----|---------------------------------------------------------|-------------|---|----|-------|---|------|
| 138 | Peroxiredoxin-6                                         | PRDX6_HUMAN | 1 | 12 | R106  |   |      |
| 139 | Phosphatidylethanolamine-binding protein 1              | PEBP1_HUMAN | 1 | 9  | R49   |   |      |
| 140 | Presequence protease, mitochondrial                     | PREP_HUMAN  | 1 | 50 | R405  |   |      |
| 141 | Profilin-1                                              | PROF1_HUMAN | 1 | 5  | R89   |   |      |
| 142 | Prohibitin-2                                            | PHB2_HUMAN  | 1 | 24 | R209  | 1 | R209 |
| 143 | Prosaposin                                              | SAP_HUMAN   | 1 | 8  | R421  |   |      |
| 144 | Protein deglycase DJ-1                                  | PARK7_HUMAN | 1 | 7  | R48   |   |      |
| 145 | Protein DEK                                             | DEK_HUMAN   | 1 | 15 | R29   | 1 | R29  |
| 146 | Protein ERGIC-53                                        | LMAN1_HUMAN | 1 | 29 | R373  | 1 | R373 |
| 147 | Protein LZIC                                            | LZIC_HUMAN  | 1 | 9  | R139  |   |      |
| 148 | Protein S100-A10                                        | S10AA_HUMAN | 1 | 2  | R32   |   |      |
| 149 | Protein S100-A13                                        | S10AD_HUMAN | 1 | 5  | R78   |   |      |
| 150 | Protein transport protein Sec61 subunit beta            | SC61B_HUMAN | 1 | 7  | R95   |   |      |
| 151 | Pyruvate kinase PKM                                     | KPYM_HUMAN  | 1 | 31 | R246  |   |      |
| 152 | Rab GDP dissociation inhibitor beta                     | GDIB_HUMAN  | 1 | 22 | R367  |   |      |
| 153 | Reticulocalbin-3                                        | RCN3_HUMAN  | 1 | 26 | R214  | 1 | R214 |
| 154 | Reticulon-3                                             | RTN3_HUMAN  | 1 | 24 | R1009 |   |      |
| 155 | Rho GDP-dissociation inhibitor 1                        | GDIR1_HUMAN | 1 | 9  | R49   | 1 | R49  |
| 156 | S-phase kinase-associated protein 1                     | SKP1_HUMAN  | 1 | 3  | R81   | 1 | R81  |
| 157 | Septin-2                                                | SEPT2_HUMAN | 1 | 24 | R91   |   |      |
| 158 | Surfeit locus protein 4                                 | SURF4_HUMAN | 1 | 9  | R19   |   |      |
| 159 | TATA element modulatory factor                          | TMF1_HUMAN  | 1 | 53 | R934  |   |      |
| 160 | Thioredoxin domain-containing protein 5                 | TXND5_HUMAN | 1 | 18 | R134  |   |      |
| 161 | Thioredoxin-dependent peroxide reductase, mitochondrial | PRDX3_HUMAN | 1 | 10 | R170  |   |      |
| 162 | Transaldolase                                           | TALDO_HUMAN | 1 | 15 | R239  |   |      |
| 163 | Transgelin-2                                            | TAGL2_HUMAN | 1 | 11 | R49   | 1 | R49  |
| 164 | Transmembrane emp24 domain-containing protein 9         | TMED9_HUMAN | 1 | 18 | R169  | 1 | R169 |
| 165 | Ubiquitin carboxyl-terminal hydrolase isozyme L1        | UCHL1_HUMAN | 1 | 9  | R153  | 1 | R153 |
| 166 | Ubiquitin-conjugating enzyme E2 N                       | UBE2N_HUMAN | 1 | 9  | R14   |   |      |

|     |                                                                |              |                  |      |                                                           |     |                 |
|-----|----------------------------------------------------------------|--------------|------------------|------|-----------------------------------------------------------|-----|-----------------|
| 167 | Uncharacterized protein                                        | E9PAM4_HUMAN | 1                | 27   | R205                                                      |     |                 |
| 168 | Very long-chain specific acyl-CoA dehydrogenase, mitochondrial | ACADV_HUMAN  | 1                | 34   | R316                                                      |     |                 |
| 169 | Vesicle-associated membrane protein 3                          | VAMP3_HUMAN  | 1                | 6    | R49                                                       | 1   | R49             |
| 170 | Voltage-dependent anion-selective channel protein 2            | VDAC2_HUMAN  | 1                | 7    | R263                                                      |     |                 |
| 171 | X-ray repair cross-complementing protein 5                     | XRCC5_HUMAN  | 1                | 27   | R141                                                      |     |                 |
| 172 | X-ray repair cross-complementing protein 6                     | XRCC6_HUMAN  | 1                | 32   | R517                                                      | 1   | R517            |
|     |                                                                |              | 353              | 5140 |                                                           | 114 |                 |
|     | Number of arginine residues with MG modification in the        |              | <b>114 (32%)</b> |      | Number of proteins with MG modification in the functional |     | <b>74 (43%)</b> |

**Glycolytic overload-driven dysfunction of periodontal ligament fibroblasts in high glucose concentration, corrected by glyoxalase 1 inducer**  
**Ashour et al.**

**Table S3. Pathways enriched with proteins susceptible to modification by methylglyoxal.**

| Pathway                                     | Count | Fold enrichment | P-value  | FDR      | Proteins                                                                                                                                                                                                                                                                                                                                                                                                                                                                                                                                                                                       |
|---------------------------------------------|-------|-----------------|----------|----------|------------------------------------------------------------------------------------------------------------------------------------------------------------------------------------------------------------------------------------------------------------------------------------------------------------------------------------------------------------------------------------------------------------------------------------------------------------------------------------------------------------------------------------------------------------------------------------------------|
| Protein processing in endoplasmic reticulum | 20    | 7.4             | 1.71E-09 | 1.30E-08 | Cytoskeleton-associated protein 4,<br>Calreticulin<br>Dolichyl-diphosphooligosaccharide-protein glycosyltransferase subunit 1<br>Endoplasmic reticulum chaperone BiP<br>Endoplasmic reticulum resident protein 29<br>Endoplasmin<br>Glucosidase 2 subunit beta<br>Heat shock cognate 71 kDa protein, HSP 90-alpha & -beta<br>Hypoxia up-regulated protein 1<br>Protein disulfide-isomerase A1, A3, A4 & A6<br>Protein ERGIC-53<br>Protein transport protein Sec61 subunit beta<br>S-phase kinase-associated protein 1<br>Ribosome-binding protein 1<br>Thioredoxin domain-containing protein 5 |
| Carbon metabolism                           | 15    | 8.3             | 3.05E-07 | 2.40E-06 | Aconitate hydratase, mitochondrial<br>Alpha-enolase<br>Dihydrolipoyllysine-residue succinyltransferase component of 2-oxoglutarate dehydrogenase complex, mitochondrial<br>Enoyl-CoA hydratase, mitochondrial<br>Fructose-bisphosphate aldolase A<br>Fumarate hydratase, mitochondrial<br>Glutamate dehydrogenase 1, mitochondrial<br>Glyceraldehyde-3-phosphate dehydrogenase                                                                                                                                                                                                                 |

|                             |    |     |          |          |                                                                                                                  |
|-----------------------------|----|-----|----------|----------|------------------------------------------------------------------------------------------------------------------|
|                             |    |     |          |          | Malate dehydrogenase, mitochondrial                                                                              |
|                             |    |     |          |          | 6-phosphogluconate dehydrogenase, decarboxylating                                                                |
|                             |    |     |          |          | Phosphoglycerate kinase 1                                                                                        |
|                             |    |     |          |          | Pyruvate kinase PKM                                                                                              |
|                             |    |     |          |          | Transaldolase                                                                                                    |
|                             |    |     |          |          | 6-phosphogluconate dehydrogenase, decarboxylating                                                                |
|                             |    |     |          |          | Aconitate hydratase, mitochondrial                                                                               |
|                             |    |     |          |          | Adenylate kinase 2, mitochondrial                                                                                |
|                             |    |     |          |          | Alpha-enolase                                                                                                    |
|                             |    |     |          |          | Citrate synthase                                                                                                 |
|                             |    |     |          |          | Dihydrolipoyllysine-residue succinyltransferase component of 2-oxoglutarate dehydrogenase complex, mitochondrial |
|                             |    |     |          |          | Enoyl-CoA hydratase, mitochondrial                                                                               |
| Biosynthesis of antibiotics | 19 | 5.6 | 6.52E-07 | 5.10E-06 | Fructose-bisphosphate aldolase A                                                                                 |
|                             |    |     |          |          | Fumarate hydratase, mitochondrial                                                                                |
|                             |    |     |          |          | Glyceraldehyde-3-phosphate dehydrogenase                                                                         |
|                             |    |     |          |          | L-lactate dehydrogenase, A chain and B chain                                                                     |
|                             |    |     |          |          | Malate dehydrogenase, mitochondrial                                                                              |
|                             |    |     |          |          | Multifunctional protein ADE2                                                                                     |
|                             |    |     |          |          | Nucleoside diphosphate kinase B                                                                                  |
|                             |    |     |          |          | Phosphoglycerate kinase 1                                                                                        |
|                             |    |     |          |          | Pyruvate kinase PKM                                                                                              |
|                             |    |     |          |          | Transaldolase                                                                                                    |
